# Supplementary material for: A compact Cas9 ortholog from Staphylococcus Auricularis (SauriCas9) expands the DNA targeting scope
Source: PLoS Biol. 2020 Mar 30;18(3):e3000686. doi: 10.1371/journal.pbio.3000686 (PMC7145270; doi:10.1371/journal.pbio.3000686)
Supplement: S1 Data — Raw data from all reported summary statistics. (XLSX) [file pbio.3000686.s008.xlsx]

## Sheet: Fig 3B
Fig. 3B Transfection of SauriCas9 with gRNA resulted in GFP expression.
		Quantification of GFP+cells (%)
		Repeat 1	Repeat 2	Average	Stdev
	CTGG	17.8	6.6	12.2	7.9196
	TCTGG	1.31	0.732	1.021	0.408708

## Sheet: Fig 3C
Fig 3C. Genome editing with SauriCas9 and SaCas9 for 12 endogenous loci.
				SauriCas9					SaCas9
		Repeat 1	Repeat 2	Repeat 3	Average	Stdev	Repeat 1	Repeat 2	Repeat 3	Average	Stdev
	E0	1.88	3.28		2.58	0.989949	1.39	2.25		1.82	0.608112
	E1	11.45	66.86		39.155	39.1808	6.99	26.94		16.965	14.1068
	E4	3.25	30.82	8.36	14.1433	14.6667	10.76	29.66	54.52	31.6467	21.9475
	G1	16.73	23.42		20.075	4.73054	13.98	8.86		11.42	3.62039
	G3	1.44	0.29		0.865	0.813173	5.24	3.85		4.545	0.982878
	G6	12.65	4.84		8.745	5.5225	7.25	10.21		8.73	2.09304
	G7	3.16	6.3	47.94	19.1333	24.9967	1.75	6.17	3.76	3.89333	2.21301
	G8	11.61	19.78	31.74	21.0433	10.1243	3.73	18.39	21.33	14.4833	9.42797
	G9	18.19	12.72	34.27	21.7267	11.2019	0.82	1.06	7.41	3.09667	3.73738
	G10	2.7	4.68	17.6	8.32667	8.09173	3.94	3.35	4.05	3.78	0.376431
	G11	1.15	1.73	39.8	14.2267	22.1491	2.25	1.62	8.93	4.26667	4.05083
	S3	3.07	6.61	4.58	4.75333	1.77635	3.16	5.83	8.63	5.87333	2.73526

## Sheet: Fig 4B
Fig. 4B SauriBE4max induces C to T conversions for a panel of nine genomic loci.
		SauriBE4max induces C to T conversions
		Repeat 1	Repeat 2	Average	Stdev
	E1-C4	2.08	1.13	1.605	0.671751
	E1-C5	7.84	4.15	5.995	2.60922
	E1-C6	21.7	11.81	16.755	6.99329
	E2-C6	12.43	7.02	9.725	3.82545
	E2-C8	10.87	6.05	8.46	3.40825
	E3-C8	19.95	3.2	11.575	11.844
	E3-C9	5.02	53.31	29.165	34.1462
	G1-C6	9.97	2.36	6.165	5.38108
	G3-C8	5.57	2.58	4.075	2.11425
	G3-C10	5.57	2.58	4.075	2.11425
	G3-C12	4.98	2.3	3.64	1.89505
	G3-C13	2.77	1.45	2.11	0.933381
	H1-C5	12.33	6.53	9.43	4.10122
	H1-C7	37.38	26.79	32.085	7.48826
	H2-C8	17.16	14.53	15.845	1.85969
	H2-C12	3.36	1.76	2.56	1.13137
	S4-C6	16.44	4.47	10.455	8.46407
	S4-C10	9.51	2.64	6.075	4.85782
	S4-C13	6	1.54	3.77	3.1537
	S5-C5	9.44	10.23	9.835	0.558614

## Sheet: Fig 4D
Fig. 4D SauriABEmax induces A to G conversions for a panel of nine genomic loci.
		SauriABEmax induces A to G conversions
		Repeat 1	Repeat 2	Average	Stdev
	A2-A7	8.91	5.01	6.96	2.75772
	A2-A11	7.14	4.3	5.72	2.00818
	E1-A7	4.89	4.85	4.87	0.0282843
	E1-A13	38.47	36.98	37.725	1.05359
	G1-A12	8.79	1.7	5.245	5.01339
	H1-A6	17.49	13	15.245	3.17491
	H1-A8	9.75	8.87	9.31	0.622254
	S1-A7	32.26	28.48	30.37	2.67286
	S1-A14	12.04	11.1	11.57	0.66468
	S2-A8	18.78	5.93	12.355	9.08632
	S2-A9	12.61	3.4	8.005	6.51245
	S2-A10	12.79	3.31	8.05	6.70337
	S3-A7	45.21	35.56	40.385	6.82358
	S3-A10	6.98	5.41	6.195	1.11016
	S3-A11	7.82	6.33	7.075	1.05359
	S4-A7	11.48	8.07	9.775	2.41123
	S4-A11	17.08	11.33	14.205	4.06586
	S4-A14	23.58	15.86	19.72	5.45886
	S5-A6	8.47	21.82	15.145	9.43988
	S5-A10	3.43	10.1	6.765	4.7164
	S5-A13	2.5	7.53	5.015	3.55675

## Sheet: Fig 5A
Fig. 5A Specificity of SauriCas9 and SaCas9 are measured by the GFP-reporter assay.
			SauriCas9						SaCas9
		Repeat 1	Repeat 2	Average	Stdev			Repeat 1	Repeat 2	Average	Stdev
	1	27.8	16.4	22.1	8.06102		1	11.1	11.3	11.2	0.141421
	2	7.19	6.55	6.87	0.452548		2	0.329	0.7337	0.53135	0.286166
	3	3.81	3	3.405	0.572756		3	0.011	0.135	0.073	0.0876812
	4	4.82	3.98	4.4	0.59397		4	0.108	0.427	0.2675	0.225567
	5	0.679	0.741	0.71	0.0438406		5	0.016	0.036	0.026	0.0141421
	6	6.55	6.26	6.405	0.205061		6	0.054	0.206	0.13	0.10748
	7	0.398	0.572	0.485	0.123037		7	0.017	0.049	0.033	0.0226274
	8	0.077	0.182	0.1295	0.0742462		8	0.368	0.534	0.451	0.11738
	9	0.036	0.135	0.0855	0.0700036		9	0.298	0.345	0.3215	0.033234
	10	1.96	2.1	2.03	0.0989949		10	3.23	4.06	3.645	0.586899
	11	4.02	3.74	3.88	0.19799		11	0.431	0.902	0.6665	0.333047
	12	0.474	0.642	0.558	0.118794		12	0.416	0.373	0.3945	0.0304056
	13	0.908	1.26	1.084	0.248902		13	0.682	0.706	0.694	0.0169706
	14	1.71	1.33	1.52	0.268701		14	0.027	0.301	0.164	0.193747
	15	0.489	0.492	0.4905	0.00212132		15	0.139	0.193	0.166	0.0381838
	16	0.46	0.48	0.47	0.0141421		16	0.058	0.189	0.1235	0.092631
	17	2.06	1.43	1.745	0.445477		17	0.256	1.08	0.668	0.582656
	18	0.343	0.407	0.375	0.0452548		18	0.147	0.188	0.1675	0.0289914
	19	0.036	0.09	0.063	0.0381838		19	0.021	0.055	0.038	0.0240416
	20	0.036	0.08	0.058	0.0311127		20	0.011	0.081	0.046	0.0494975
	21	0	0.11	0.055	0.0777817		21	0.022	0.055	0.0385	0.0233345

## Sheet: Fig 5D
Fig. 5D Indel frequencies detected by targeted deep sequencing
			SauriCas9				SaCas9
		Repeat 1	Repeat 2	Average	Stdev	Repeat 1	Repeat 2	Average	Stdev
	G10-on	2.7	4.68	3.69	1.40007	3.94	3.35	3.645	0.417193
	G10-OT1	0.21	0.27	0.24	0.0424264	0.22	0.23	0.225	0.00707107
	G10-OT2	0.23	0.29	0.26	0.0424264	0.27	0.26	0.265	0.00707107

## Sheet: Fig 6D
Fig. 6D Specificity of eSa-SauriCas9 is measured by the GFP-reporter assay.
		Specificity of eSa-SauriCas9
		Repeat 1	Repeat 2	Average	Stdev
	1	6.44	5.9	6.17	0.381838
	2	0.193	0.692	0.4425	0.352846
	3	0.031	0.143	0.087	0.079196
	4	0.015	0.399	0.207	0.271529
	5	0.02	0.076	0.048	0.039598
	6	0.025	0.097	0.061	0.0509117
	7	0.01	0.049	0.0295	0.0275772
	8	0.056	0.277	0.1665	0.156271
	9	0.067	0.159	0.113	0.0650538
	10	0.612	1	0.806	0.274357
	11	0.036	0.155	0.0955	0.0841457
	12	0.036	0.323	0.1795	0.20294
	13	0.189	0.542	0.3655	0.249609
	14	0.036	0.16	0.098	0.0876812
	15	0.02	0.131	0.0755	0.0784889
	16	0.015	0.09	0.0525	0.053033
	17	0.041	0.089	0.065	0.0339411
	18	0.02	0.061	0.0405	0.0289914
	19	0.005	0.03	0.0175	0.0176777
	20	0.015	0.056	0.0355	0.0289914
	21	0.005	0.078	0.0415	0.0516188

## Sheet: Fig 6E
Fig. 6E eSa-SauriCas9 generates indels for a panel of 14 endogenous loci.
		eSa-SauriCas9 generates indels
		Repeat 1	Repeat 2	Repeat 3	Average	Stdev
	A2	20.16	2.97		11.565	12.1552
	E3	19.23	43.48		31.355	17.1473
	E4	17.63	21.25	14.55	17.81	3.35362
	E7	20.04	0.26	5.62	8.64	10.23
	G1	3.45	4.23		3.84	0.551543
	G4	5.19	2.21		3.7	2.10718
	G7	5.27	5.35	3.45	4.69	1.07462
	G8	16.36	1.57		8.965	10.4581
	H1	10.75	14.49		12.62	2.64458
	S1	9.13	7.49		8.31	1.15966
	S2	10.24	5.37		7.805	3.44361
	S3	19.31	18.73		19.02	0.410122
	S4	18.99	16.89		17.94	1.48492
	S5	21.86	20.11		20.985	1.23744

## Sheet: Fig 7D
Fig. 7D Specificity of SauriCas9-KKH is measured by the GFP-reporter assay.
		Specificity of SauriCas9-KKH
		Repeat 1	Repeat 2	Average	Stdev
	1	7.3	5.1	6.2	1.55563
	2	0.451	0.614	0.5325	0.115258
	3	0.107	0.208	0.1575	0.0714178
	4	0.156	0.248	0.202	0.0650538
	5	0.048	0.084	0.066	0.0254558
	6	0.462	0.437	0.4495	0.0176777
	7	0.016	0.081	0.0485	0.0459619
	8	0.028	0.066	0.047	0.0268701
	9	0.011	0.07	0.0405	0.0417193
	10	0.241	0.384	0.3125	0.101116
	11	0.336	0.437	0.3865	0.0714178
	12	0.106	0.1	0.103	0.00424264
	13	0.216	0.28	0.248	0.0452548
	14	0.253	0.282	0.2675	0.0205061
	15	0.095	0.143	0.119	0.0339411
	16	0.027	0.077	0.052	0.0353553
	17	0.193	0.165	0.179	0.019799
	18	0.021	0.054	0.0375	0.0233345
	19	0.011	0.059	0.035	0.0339411
	20	0.006	0.06	0.033	0.0381838
	21	0.027	0.063	0.045	0.0254558

## Sheet: Fig 7E
Fig. 7E SauriCas9-KKH generates indels for a panel of 15 endogenous loci.
		SauriCas9-KKH generates indels
		Repeat 1	Repeat 2	Repeat 3	Average	Stdev
	A1	0.36	4.49	0.36	1.73667	2.38446
	A2	7.1	3.93	1.38	4.13667	2.86559
	E4	19.54	31.92	5.62	19.0267	13.1575
	E5	14.94	4.46	2.89	7.43	6.55105
	E6	7.18	1.53	3.38	4.03	2.88054
	G5	3.85	3.35	1.48	2.89333	1.24925
	G9	8.31	9.62	8.58	8.83667	0.691689
	G10	19.69	13.65	4.68	12.6733	7.55251
	G11	4.36	2.92	1.72	3	1.32182
	R1	0.22	3.49		1.855	2.31224
	S1	4.65	3.38		4.015	0.898026
	S2	2.94	1.89		2.415	0.742462
	S3	8.36	6.28		7.32	1.47078
	S4	8.58	9.99		9.285	0.997021
	S5	8.99	9.62		9.305	0.445477

[truncated: 6 more sheets: S2 Fig, S3A Fig, S3B-E Fig, S4 Fig, S5A Fig, S5B-E Fig]
