# Supplementary material for: A compact Cas9 ortholog from Staphylococcus Auricularis (SauriCas9) expands the DNA targeting scope
Source: PLoS Biol. 2020 Mar 30;18(3):e3000686. doi: 10.1371/journal.pbio.3000686 (PMC7145270; doi:10.1371/journal.pbio.3000686)
Supplement: S1 Table — The Cas9 gene of SauriCas9, SauriCas9-KKH, and eSa-SauriCas9 were synthesized; others were obtained from Addgene. eSa-SauriCas9, enhanced specificity SaCas9-SauriCas9; SaCas9, a Cas9 derived from S. aureus; SauriCas9, a Cas9 derived from S. auricularis; SauriCas9-KKH, triple mutations (Q788K/Y973K/R1020H) on SauriCas9. (XLSX) [file pbio.3000686.s009.xlsx]

## Sheet: Sheet1
CAS9_Addgene NO.	ORGANISM	CAS9_REPEAT&TRACR	CAS9_Amino Acid	Human codon-optimized Cas9_Gene
103070	Acidothermus cellulolyticus (strain ATCC 43068 / 11B)	GCTGGGGAGCCTGTCTCAATCCCCCGGCTAAAATG&GAGCGGCGCGATGTATACTCGCAGCGAGACAGGCTACCTAGCAAGACCCCTTCGTGGGGTCGCATTCTTCACCCCCTCGCAGCAGCGAGGGGGTTCGTTTATGATCACGGATGCCACCCGCCCGCAGCGTCAGAGACTCGTCCGCGGCGTCTCGTCCGCAGCC	MGGSEVGTVPVTWRLGVDVGERSIGLAAVSYEEDKPKEILAAVSWIHDGGVGDERSGASRLALRGMARRARRLRRFRRARLRDLDMLLSELGWTPLPDKNVSPVDAWLARKRLAEEYVVDETERRRLLGYAVSHMARHRGWRNPWTTIKDLKNLPQPSDSWERTRESLEARYSVSLEPGTVGQWAGYLLQRAPGIRLNPTQQSAGRRAELSNATAFETRLRQEDVLWELRCIADVQGLPEDVVSNVIDAVFCQKRPSVPAERIGRDPLDPSQLRASRACLEFQEYRIVAAVANLRIRDGSGSRPLSLEERNAVIEALLAQTERSLTWSDIALEILKLPNESDLTSVPEEDGPSSLAYSQFAPFDETSARIAEFIAKNRRKIPTFAQWWQEQDRTSRSDL…	atggggggttcagaggtcggtaccgtgccggtaacctggcggctcggcgtggacgtgggggaaagatcaatcgggcttgctgccgtgtcatatgaagaggacaagcctaaggaaatcttggctgcagtgtcctggatccatgatgggggggttggcgatgaacggtccggggcaagtcgacttgccctccgaggcatggcaagaagagcccgaaggctgcgccggtttaggagagcccgcctccgcgacctggacatgttgctgagtgagttgggatggacccccctccctgacaaaaacgtctcaccagttgatgcctggctggcacgcaaaagactggccgaggaatatgtggtggatgaaactgagaggcgaagactgctgggctacgccgtgtct…
103071	Akkermansia muciniphila (strain ATCC BAA-835)	GTTTTGCCTTGAATCCAAAATAAGGCACAGTACAA&CACTTTAACTCCCAACGGATTCAAGACAAAATTTGAAATGCAAACCGATTTTCCTGACTGCCAGCCAGTCACACCGGTAACAAAAGCATTTT	MSRSLTFSFDIGYASIGWAVIASASHDDADPSVCGCGTVLFPKDDCQAFKRREYRRLRRNIRSRRVRIERIGRLLVQAQIITPEMKETSGHPAPFYLASEALKGHRTLAPIELWHVLRWYAHNRGYDNNASWSNSLSEDGGNGEDTERVKHAQDLMDKHGTATMAETICRELKLEEGKADAPMEVSTPAYKNLNTAFPRLIVEKEVRRILELSAPLIPGLTAEIIELIAQHHPLTTEQRGVLLQHGIKLARRYRGSLLFGQLIPRFDNRIISRCPVTWAQVYEAELKKGNSEQSARERAEKLSKVPTANCPEFYEYRMARILCNIRADGEPLSAEIRRELMNQARQEGKLTKASLEKAISSRLGKETETNVSNYFTLHPDSEEALYLNPAVEVLQRSGI…	atgtcaaggagcctcactttcagcttcgacatcggttacgcttccattgggtgggccgtgattgctagtgcctcccatgacgacgccgatccttctgtgtgtgggtgcggaacggtgctgtttccaaaggatgactgtcaggcattcaaaaggagagagtatagaaggctgcgcaggaacatccgaagtcgcagagtccggatcgagcggatcgggagactccttgtgcaagctcagatcatcacacccgaaatgaaagaaacctccggccacccagcacctttttaccttgcaagcgaggccctgaaagggcatcggacactggctccaattgaattgtggcacgtgcttaggtggtatgcacacaaccgagggtatgacaacaacgcgtcttggtct…
103072	Acidovorax ebreus (strain TPSY)	GTTGTAGCTCCCTCTCTCACCCCGGATAGCTACAC&TTGTGGTTATCCGGGGTGAGAGCCGTTGCTGCAATAAGGAGGGGTCGCAAGACCCCGTCCGTACCCAAAAGCCTGGCAGGGAAACCTGTCAGGCTTTT	MAQHVFGLDIGIASVGWAILGEQRIIDLGVRCFDKAETAKEGDPLNLTRRQARLLRRRLYRRAWRLTQLSRLLKRKGLIADAKLFAKAPSYGDSAWELRRQGLDRLLTPLEWARVIYHQCKHRGFHWTSKAEEAKADSDAEGGRVKQGLAHTKALMQAKNYRSAAEMVLAEFPDAQRNKRGQYDKALSRVLLGEELALLFATQRRLGNPHASDFFEKLILGDGDRKSGLFWQQKPALSGADLLKMLGKCTFEKGEYRAPKASFSVERHVWLTRLNNLRIVVDGRSRPLNEAERQAALLLPYQTETSKYKTLKNAFIKAGLWGDGVRFGGLAYPSQAQIDAEKTKDPEDQFLVKLPAWHELRKAFKAAGHEALWQQISTPALDGDPTLLDQIATVLSVYK…	atggcccaacatgtattcggcctcgacatcgggattgcttccgtgggatgggctatcctgggggaacagaggataatcgatctcggcgtgcgatgttttgacaaggcagagacggccaaggaaggcgatcctttgaacttgaccaggaggcaggcccgccttctgcgacggcgcctgtacaggcgcgcttggagattgacacagctcagcaggctcctgaaacgaaaagggctgattgccgatgccaagctcttcgccaaagctcctagctatggtgacagtgcgtgggagctgcgccgacaggggctggatcggcttctgacaccactggaatgggcccgggtcatctatcatcagtgtaaacatcgagggttccattggacgtctaaagccgaggaa…
103074	Azospirillum sp. (strain B510)	GTTGCGGCTGGACCCCCGATCCCCATCGGCTACAC&TTCGATGGGGATCGGGGGTCCAGCCGTTAACATGTTCCCTTCGGGGAGCACGAAATGCGGGGCGGGCCACGGTCCGCCCCTTTT	MARPAFRAPRREHVNGWTPDPHRISKPFFILVSWHLLSRVVIDSSSGCFPGTSRDHTDKFAEWECAVQPYRLSFDLGTNSIGWGLLNLDRQGKPREIRALGSRIFSDGRDPQDKASLAVARRLARQMRRRRDRYLTRRTRLMGALVRFGLMPADPAARKRLEVAVDPYLARERATRERLEPFEIGRALFHLNQRRGYKPVRTATKPDEEAGKVKEAVERLEAAIAAAGAPTLGAWFAWRKTRGETLRARLAGKGKEAAYPFYPARRMLEAEFDTLWAEQARHHPDLLTAEAREILRHRIFHQRPLKPPPVGRCTLYPDDGRAPRALPSAQRLRLFQELASLRVIHLDLSERPLTPAERDRIVAFVQGRPPKAGRKPGKVQKSVPFEKLRGLLELPPGTG…	atggcaagaccagcgttccgcgccccgaggagggaacatgtcaatggttggactcccgaccctcatagaatcagtaagcctttcttcatcctggtcagctggcacctgttgtccagagttgtcatcgacagcagcagcggctgcttcccggggacctctagggaccacactgacaagttcgcagaatgggaatgcgcagttcagccctataggctcagcttcgacctcggtacaaattctattggctggggtcttcttaatctggacagacagggcaaacctcgagagattagagccttggggtccagaatcttcagcgatggacgagatccacaagacaaagcctcattggctgtggctcggcggctggcccggcagatgaggcggaggcgggatcga…
103077	Alicycliphilus denitrificans (strain DSM 14773 / CIP 107495 / K601)	GTTCCGGCCAGTGCGCATATCCCAGTGATCTAGAA&CTCAGTTCACTGGGATATGCGCTCTGACCGCTAACAAGCTGAAAGATGCACCAAATGGAAAGCCCCGCATGCGGGGCTTTCGTCTTTT	MRSLRYRLALDLGSTSLGWALFRLDACNRPTAVIKAGVRIFSDGRNPKDGSSLAVTRRAARAMRRRRDRLLKRKTRMQAKLVEHGFFPADAGKRKALEQLNPYALRAKGLQEALLPGEFARALFHINQRRGFKSNRKTDKKDNDSGVLKKAIGQLRQQMAEQGSRTVGEYLWTRLQQGQGVRARYREKPYTTEEGKKRIDKSYDLYIDRAMIEQEFDALWAAQAAFNPTLFHEAARADLKDTLLHQRPLRPVKPGRCTLLPEEERAPLALPSTQRFRIHQEVNHLRLLDENLREVALTLAQRDAVVTALETKAKLSFEQIRKLLKLSGSVQFNLEDAKRTELKGNATSAALARKELFGAAWSGFDEALQDEIVWQLVTEEGEGALIAWLQTHTGVDEAR…	atgaggagcttgcggtatcgactggcactggacctggggtcaactagcctgggatgggccctctttcgcctggatgcctgcaacaggccaacggccgttatcaaggccggcgtgcggatattttctgacgggagaaaccctaaggatggctccagtctggccgtgacccgacgggcggctagagccatgcgccgaaggcgcgataggctgctgaaaaggaagactcgaatgcaagccaagttggtggaacatggattcttccccgccgatgccggaaaacgaaaggctctggagcagcttaacccttacgccttgagagctaaggggttgcaggaggccctgctgccgggagaattcgcgcgggcactgtttcatatcaaccagaggagaggatttaag…
103078	Alicyclobacillus hesperidum URH17-3-68	GTCATAGTTCCCTCACAAGCCTCGATGTGGTATGA&ATCATACCACATCAAGGCTTGCGAGGTTGCTATGATAAGGCAACAGGCCGCAAAGCACTGACCCGCATTCCAATGAATGCGGGTCATCTACTTTT	MAYRLGLDIGITSVGWAVVALEKDESGLKPVRIQDLGVRIFDKAEDSKTGASLALPRREARSARRRTRRRRHRLWRVKRLLEQHGILSMEQIEALYAQRTSSPDVYALRVAGLDRCLIAEEIARVLIHIAHRRGFQSNRKSEIKDSDAGKLLKAVQENENLMQSKGYRTVAEMLVSEATKTDAEGKLVHGKKHGYVSNVRNKAGEYRHTVSRQAIVDEVRKIFAAQRALGNDVMSEELEDSYLKILCSQRNFDDGPGGDSPYGHGSVSPDGVRQSIYERMVGSCTFETGEKRAPRSSYSFERFQLLTKVVNLRIYRQQEDGGRYPCELTQTERARVIDCAYEQTKITYGKLRKLLDMKDTESFAGLTYGLNRSRNKTEDTVFVEMKFYHEVRKALQRAG…	atggcatacaggctgggactcgatatcggcatcacaagtgtgggatgggcagtggtcgcgttggagaaggacgagagcggcctcaaaccagttaggattcaggacctcggcgtacgcattttcgacaaagccgaagatagcaaaaccggagcgagtctggctcttcctcgacgagaggcaagaagcgccagaaggcggaccagacgccgcaggcatcgactgtggagggttaaacggctgctggagcagcacggcattttgtcaatggagcagattgaagccctctatgcccagcgcacatcctcacccgacgtgtacgccctcagagtggcggggctcgacaggtgtctgattgccgaggagatcgctcgcgtcctgatccatattgcgcaccgacgg…
103079	Alcanivorax pacificus W11-5	GTTCCGATTCCCCACCATCGGAAAGTTCGATAGCAT&CGGTATCGAACTTTCCGATGGTGGGGACCTTCGGTAACAAGATGAGAGCTTCGGCTCGACATCACCGATACTGGATAGCCCCTTCGGGGGCTTTCTTCTTTT	MRYRVGLDLGTASVGAAVFSMDEQGNPMELIWHYERLFSEPLVPDMGQLKPKKAARRLARQQRRQIDRRASRLRRIAIVSRRLGIAPGRNDSGVHGNDVPTLRAMAVNERIELGQLRAVLLRMGKKRGYGGTFKAVRKVGEAGEVASGASRLEEEMVALASVQNKDSVTVGEYLAARVEHGLPSKLKVAANNEYYAPEYALFRQYLGLPAIKGRPDCLPNMYALRHQIEHEFERIWATQSQFHDVMKDHGVKEEIRNAIFFQRPLKSPADKVGRCSLQTNLPRAPRAQIAAQNFRIEKQMADLRWGMGRRAEMLNDHQKAVIRELLNQQKELSFRKIYKELERAGCPGPEGKGLNMDRAALGGRDDLSGNTTLAAWRKLGLEDRWQELDEVTQIQVINF…	atgcggtaccgcgtaggcctggatctgggaaccgcgtcagtgggagctgccgtgttcagtatggatgagcagggtaaccccatggagcttatctggcactatgaacgccttttctctgaacccttggtccctgatatgggccagcttaaacccaagaaagccgcccgccgattggcgaggcagcagagaaggcagattgatcgaagggctagtcgactgcggcgaatagctatcgtttctcgcaggttggggatagccccagggagaaatgactctggagtgcacggaaacgacgtccccactctccgcgccatggctgtgaatgaacgaatcgagctggggcaattgcgcgctgtgcttctccgaatgggcaaaaagcgggggtacggaggaacattt…
103083	Dinoroseobacter shibae (strain DSM 16493 / NCIMB 14021 / DFL 12)	GTTGCGGCTGGACCCCGAATTCTGAACAGCTAAAC&CGTTCAGAATTCGCGGTCGAGCCGTTAACAAGCTCGAAGAAGCACCACATTAAAACGCGTCCTGCGGGGCGCGTTTT	MRLGLDIGTSSIGWWLYETDGAGSDARITGVVDGGVRIFSDGRDPKSGASLAVDRRAARAMRRRRDRYLRRRATLMKVLAETGLMPADPAEAKALEALDPFALRAAGLDEPLPLPHLGRALFHLNQRRGFKSNRKTDRGDNESGKIKDATARLDMEMMANGARTYGEFLHKRRQKATDPRHVPSVRTRLSIANRGGPDGKEEAGYDFYPDRRHLEEEFHKLWAAQGAHHPELTETLRDLLFEKIFFQRPLKEPEVGLCLFSGHHGVPPKDPRLPKAHPLTQRRVLYETVNQLRVTADGREARPLTREERDQVIHALDNKKPTKSLSSMVLKLPALAKVLKLRDGERFTLETGVRDAIACDPLRASPAHPDRFGPRWSILDADAQWEVISRIRRVQSDAE…	atgcgcctggggctggatattggcacatcatctattgggtggtggctctatgaaaccgacggggctggaagtgacgctagaatcactggcgtcgtcgatgggggagtgagaatctttagcgacggccgggaccccaagtccggtgccagcctcgctgtcgaccggagagcagccagagcaatgcgccgcagacgagatcggtacctccgccgcagggctactctcatgaaagtgctcgcagagactggcctcatgccagcggaccccgccgaagccaaagccctggaggcattggatccatttgccttgcgagcagcagggctggatgaacctctccctcttccccacctcgggagagctcttttccacctcaatcagaggcgaggttttaagtctaat…
103084	Eubacterium dolichum DSM 3991	GTTTTGTTACCATATGGATTTTTGCTAGATTAAGA&ATCATAATCTAGCAAAAGTTTATATGATCTAACAAAACAAGGGTTTATCCCGGAATCAAGTTCCAAGTATATGCTTGGAGCTTTT	MEVFMGRLVLGLDIGITSVGFGIIDLDESEIVDYGVRLFKEGTAAENETRRTKRGGRRLKRRRVTRREDMLHLLKQAGIISTSFHPLNNPYDVRVKGLNERLNGEELATALLHLCKHRGSSVETIEDDEAKAKEAGETKKVLSMNDQLLKSGKYVCEIQKERLRTNGHIRGHENNFKTRAYVDEAFQILSHQDLSNELKSAIITIISRKRMYYDGPGGPLSPTPYGRYTYFGQKEPIDLIEKMRGKCSLFPNEPRAPKLAYSAELFNLLNDLNNLSIEGEKLTSEQKAMILKIVHEKGKITPKQLAKEVGVSLEQIRGFRIDTKGSPLLSELTGYKMIREVLEKSNDEHLEDHVFYDEIAEILTKTKDIEGRKKQISELSSDLNEESVHQLAGLTKFTA…	atggaggtgtttatgggcagattggtcctcggtcttgacattggtattacaagtgtaggtttcggcatcattgacctggacgaatctgagatagttgactacggagtgaggctgttcaaggaaggaactgctgccgaaaatgaaacccgacgcaccaaaagaggaggcaggcgactgaaaagacgccgcgttaccagaagagaggacatgctccacctgctgaaacaggcaggaattataagtacaagcttccatcctttgaataacccttatgatgttcgggtgaagggtttgaatgaaagactgaacggagaggaactggcaactgctctgctccatctctgcaagcacaggggcagctcagtcgaaaccattgaagacgacgaagctaaggcaaag…
103085	Clostridium perfringens D str. JGS1721	GTTATAGTTCCTAGTAAATTCTCGATATGCTATAA&GTATAGCATATCGAGAGTTTAACTAGTTACTATAACAAGGCATTAAGCCGTAAAGTATCCCCTATGTTCATTTGAACCTAGGGGTATCTTTT	MNKDINYALGLDIGITSVGWAVINLDLNRIEDLGVRIFNAAENLKDGSSLALPRRLARGRRRLLRRKAYRVERVRKLILKNNILTKEELEGLFKNKEVIDVWEARVKGLDYKLSREEWAKILINFCKRRGFKSNRKNEAKDKEAGQILSSISYNIEKMKETNSRTIGEYIYNEVKNSEDSYAPLRNKFGEYKMCVSRDVIREEIHTLFEKQRELGNNFASDEIEDKYFEIFNSQRPFSNFEDLEKLVGFCTFERKKHKRAPKHCISSEEFTLYEGINKLSIIKDGEKRKLSEEERTLVVNEAFNKKEIKYTTLRKLLGLSEEELFSTLTYSIDKDISKTENTKFVSLKGYHEIKRAIEKGVSKKAWQDIENNRNLLNDIAYVLTLGKTDDEIEKQLRLR…	atgaacaaagacatcaactacgccctggggctggatatcggcatcacctccgtcggctgggcagttataaacctggatttgaaccgaatcgaagatctgggcgtgagaatttttaacgcagccgagaatctcaaagatggttcatcattggctctcccgaggcggcttgcacgcggacgaagaaggctcctgcgcaggaaagcataccgagtcgaaagagtgcggaagctgattcttaaaaacaacatactcaccaaggaggaattggagggtttgttcaaaaataaggaggtgatcgacgtctgggaagcccgcgtgaaaggtctggattacaaactgtctagagaagagtgggccaagattctcatcaatttttgcaagaggcgcggttttaagagc…
103089	Clostridium cellulolyticum (strain ATCC 35319 / DSM 5812 / JCM 6584 / H10)	GTTATAGCTCCAATTCAGGCTCCGATATGCTATAA&ATTATGGCATATCGGAGCCTGAATTGTTGCTATAATAAGGTGCTGGGTTTAGCCCAGACCGCCAAGTTAACCCCGGCATTTATTGCTGGGGTATCTTGTTTT	MKYTLGLDVGIASVGWAVIDKDNNKIIDLGVRCFDKAEESKTGESLATARRIARGMRRRISRRSQRLRLVKKLFVQYEIIKDSSEFNRIFDTSRDGWKDPWELRYNALSRILKPYELVQVLTHITKRRGFKSNRKEDLSTTKEGVVITSIKNNSEMLRTKNYRTIGEMIFMETPENSNKRNKVDEYIHTIAREDLLNEIKYIFSIQRKLGSPFVTEKLEHDFLNIWEFQRPFASGDSILSKVGKCTLLKEELRAPTSCYTSEYFGLLQSINNLVLVEDNNTLTLNNDQRAKIIEYAHFKNEIKYSEIRKLLDIEPEILFKAHNLTHKNPSGNNESKKFYEMKSYHKLKSTLPTDIWGKLHSNKESLDNLFYCLTVYKNDNEIKDYLQANNLDYLIEYIA…	atgaagtataccctcggacttgacgtgggaatcgcttctgttggatgggcagtaattgacaaggataacaataagatcatcgacttgggcgtaaggtgcttcgataaagcagaggaatctaagaccggggagtctctcgctaccgctcgcagaatagcccgcggcatgagaagacggatttcaagacgctcccaacggcttcggcttgtgaaaaaactctttgtgcagtacgagattattaaagatagcagtgagtttaacagaatattcgacactagcagagatggatggaaagacccatgggagctgagatataacgccctcagccgcatactcaagccctatgagcttgtccaggttcttacccacattacgaaaagacgaggattcaagtccaac…
103091	Roseburia intestinalis L1-82	GTTGTAATTCCCTGTTATCACTTGGTATGGTATAA&ATTATATCATACCAAGTGATAATTAGGTTATTACAATAAGGTAAGAAACCTAAAAGCTCTAATCCCATTCTTCGGAATGGGATTATCTTTT	MRENGSDERRRNMDEKMDYRIGLDIGIASVGWAVLQNNSDDEPVRIVDLGVRIFDTAEIPKTGESLAGPRRAARTTRRRLRRRKHRLDRIKWLFENQGLINIDDFLKRYNMAGLPDVYQLRYEALDRKLTDEELAQVLLHIAKHRGFRSTRKAETAAKENGAVLKATDENQKRMQEKGYRTVGEMIYLDEAFRTGCSWSEKGYILTPRNKAENYQHTMLRAMLVEEVKEIFSSQRRLGNEKATEELEEKYLEIMTSQRSFDLGPGMQPDGKPSPYAMEGFSDRVGKCTFLGDQGELRGAKGTYTAEYFVALQKINHTKLVNQDGETRNFTEEERRALTLLLFTQKEVKYAAVRKKLGLPEDILFYNLNYKKAATKEEQQKENQNTEKAKFIGMPYYHDY…	atgagagagaatggatccgacgagcggaggcggaatatggacgagaaaatggactaccggataggacttgatattggaatagcatctgtggggtgggccgtgttgcagaataactccgacgatgaaccggtaagaatcgtagatttgggggtgagaattttcgacacagcagaaatcccaaagaccggcgaatccctggcaggaccccggcgcgcagcgcgcaccactcgaaggagactgagacgccgaaaacatagacttgacaggatcaaatggctgttcgaaaaccaggggctgatcaacatcgacgatttcctgaagagatataacatggcaggcctccctgacgtgtatcagctgaggtacgaagctctggaccgaaagctgaccgatgaggaa…
103092	Lactobacillus rhamnosus (strain ATCC 53103 / GG)	GTCTCAGGTAGATGTCAGATCAATCAGTTCAAGAG&ACTTGAATTGATTGATCTGACATCTACGAGTTGAGATCAAACAAAGCTTCAGCTGAGTTTCAATTTCTGAGCCCATGTTGGGCCATACATATGCCACCCGAGTGCAAATCGGGTGGCTTTT	MTKLNQPYGIGLDIGSNSIGFAVVDANSHLLRLKGETAIGARLFREGQSAADRRGSRTTRRRLSRTRWRLSFLRDFFAPHITKIDPDFFLRQKYSEISPKDKDRFKYEKRLFNDRTDAEFYEDYPSMYHLRLHLMTHTHKADPREIFLAIHHILKSRGHFLTPGAAKDFNTDKVDLEDIFPALTEAYAQVYPDLELTFDLAKADDFKAKLLDEQATPSDTQKALVNLLLSSDGEKEIVKKRKQVLTEFAKAITGLKTKFNLALGTEVDEADASNWQFSMGQLDDKWSNIETSMTDQGTEIFEQIQELYRARLLNGIVPAGMSLSQAKVADYGQHKEDLELFKTYLKKLNDHELAKTIRGLYDRYINGDDAKPFLREDFVKALTKEVTAHPNEVSEQLLN…	atgacaaagctgaaccagccctatggaatcggcctcgatattggaagtaatagcatcggcttcgccgtggtagatgcgaactcacacctgcttcgcctgaaaggggagactgccatcggagctaggctgtttcgcgaagggcaaagtgcagccgatcggagaggtagccgcacaacaaggagaagactcagtcgaactagatggaggctgtccttcctgagggactttttcgccccacacataaccaagattgatcctgattttttcctgagacagaagtacagcgaaatcagccccaaagataaggaccggtttaagtatgaaaaaagattgtttaatgacagaacagacgcggaattctacgaggattatcccagcatgtaccatcttaggctccac…
103097	Filifactor alocis (strain ATCC 35896 / D40 B5)	GTTTGAGAGTAGTGTAATTTCATATGGTAGTCAAA&GTTGACTACCATATGAGATTACACTACACGGTTCAAATAAAGAATTTTTCTAATCGCCCAATGGGCCCATATTGATATGGATGAAACTCGCTTAGCGAGTTTT	MTKEYYLGLDVGTNSVGWAVTDSQYNLCKFKKKDMWGIRLFESANTAKDRRLQRGNRRRLERKKQRIDLLQEIFSPEICKIDPTFFIRLNESRLHLEDKSNDFKYPLFIEKDYSDIEYYKEFPTIFHLRKHLIESEEKQDIRLIYLALHNIIKTRGHFLIDGDLQSAKQLRPILDTFLLSLQEEQNLSVSLSENQKDEYEEILKNRSIAKSEKVKKLKNLFEISDELEKEEKKAQSAVIENFCKFIVGNKGDVCKFLRVSKEELEIDSFSFSEGKYEDDIVKNLEEKVPEKVYLFEQMKAMYDWNILVDILETEEYISFAKVKQYEKHKTNLRLLRDIILKYCTKDEYNRMFNDEKEAGSYTAYVGKLKKNNKKYWIEKKRNPEEFYKSLGKLLDKIEP…	atgacaaaagaatactatttgggtttggacgtgggaacaaacagcgtagggtgggccgtgactgatagccagtataacctttgcaaatttaagaagaaagacatgtggggcattcggttgttcgaatcagccaacacagcaaaagacagaagactgcaaaggggcaaccgaaggcgcctggagaggaagaaacaaagaattgacttgctccaggaaatcttctcccccgaaatttgcaagatcgaccctacttttttcattcgcctcaatgagtcccgccttcatctggaggacaaaagcaacgattttaagtaccctctcttcattgagaaagactactccgacatagagtactataaggaattcccaacaatattccatctgcggaagcacctcata…
103099	Bifidobacterium bifidum (strain S17)	GTTTCAGATGCCTGTCAGATCAATGACTTTGACCA&ATGATCAAGGTCATTGACCTGACAGGCATAAATTGAAATAAAGCAAGGTTTCGACCAAGCTTCAGAAGGTTTTATACCTGGCCTTATGGCTGTGAGGCTCCCGATAATGTCGGGAGCCTCTTTT	MSRKNYVDDYAISLDIGNASVGWSAFTPNYRLVRAKGHELIGVRLFDPADTAESRRMARTTRRRYSRRRWRLRLLDALFDQALSEIDPSFLARRKYSWVHPDDENNADCWYGSVLFDSNEQDKRFYEKYPTIYHLRKALMEDDSQHDIREIYLAIHHMVKYRGNFLVEGTLESSNAFKEDELLKLLGRITRYEMSEGEQNSDIEQDDENKLVAPANGQLADALCATRGSRSMRVDNALEALSAVNDLSREQRAIVKAIFAGLEGNKLDLAKIFVSKEFSSENKKILGIYFNKSDYEEKCVQIVDSGLLDDEEREFLDRMQGQYNAIALKQLLGRSTSVSDSKCASYDAHRANWNLIKLQLRTKENEKDINENYGILVGWKIDSGQRKSVRGESAYENMR…	atgagcagaaaaaactatgtcgacgactacgcaataagcctggacatcggaaacgcttccgtggggtggagcgcctttacccctaactatcgactggtgcgcgccaagggtcacgagctcatcggcgttagactctttgatccagccgatactgcagaaagtagaagaatggcgaggacaaccagacgcagatactctcgaaggcgctggcgactgcggttgttggatgcactgttcgatcaggctcttagtgaaattgatccatccttccttgctaggagaaaatactcctgggtgcatcctgatgatgaaaataacgccgattgttggtatggctctgtcctgttcgattctaacgaacaggataagagattttatgagaaatatcccacaatttac…
103100	Ilyobacter polytropus (strain DSM 2926 / CuHBu1)	GTTGTACTTCCCTAATTATTTTAGCTATGTTACAA&CGTCAACATAGCTAAAATAATATAGGTTAGTACAATAAAGGTAAATACTTTTAGTATTAATCCTGTAAGGCTCTAAACCTCTAGTCTCTTGACTAGAGGTTTATCCTTTT	MKYSIGLDIGIASVGWSVINKDKERIEDMGVRIFQKAENPKDGSSLASSRREKRGSRRRNRRKKHRLDRIKNILCESGLVKKNEIEKIYKNAYLKSPWELRAKSLEAKISNKEIAQILLHIAKRRGFKSFRKTDRNADDTGKLLSGIQENKKIMEEKGYLTIGDMVAKDPKFNTHVRNKAGSYLFSFSRKLLEDEVRKIQAKQKELGNTHFTDDVLEKYIEVFNSQRNFDEGPSKPSPYYSEIGQIAKMIGNCTFESSEKRTAKNTWSGERFVFLQKLNNFRIVGLSGKRPLTEEERDIVEKEVYLKKEVRYEKLRKILYLKEEERFGDLNYSKDEKQDKKTEKTKFISLIGNYTIKKLNLSEKLKSEIEEDKSKLDKIIEILTFNKSDKTIESNLKKL…	atgaagtattctatcggactggacattgggatcgcgtcagtgggttggagcgtcatcaacaaggacaaggagagaatagaggacatgggggtgagaatcttccagaaagcagagaacccgaaggatggatccagccttgcatcctcacgccgcgaaaagaggggatctcggcgccgaaaccgacggaaaaagcatcggctggataggatcaagaatattctctgtgagtccggccttgtgaagaaaaatgaaatcgagaagatttataaaaatgcgtacctgaaaagcccgtgggagttgcgcgccaagtctctcgaggccaagatatccaacaaagagatcgctcagattctgctccacattgccaaaaggcggggctttaaatcctttcggaaaacc…
103101	Enterococcus faecalis TX0012	GTTTTTGTATTCTCAATAATTTCTTATCAGTAAAACAGA&ATTTTACTGATAAGAAATTATTGAGAATCTACAAAAATAAGGCATCTTGCCGAATTTACCGCCCTACATATGTAGGGCGGTTTT	MYSIGLDLGISSVGWSVIDERTGNVIDLGVRLFSAKNSEKNLERRTNRGGRRLIRRKTNRLKDAKKILAAVGFYEDKSLKNSCPYQLRVKGLTEPLSRGEIYKVTLHILKKRGISYLDEVDTEAAKESQDYKEQVRKNAQLLTKYTPGQIQLQRLKENNRVKTGINAQGNYQLNVFKVSAYANELATILKTQQAFYPNELTDDWIALFVQPGIAEEAGLIYRKRPYYHGPGNEANNSPYGRWSDFQKTGEPATNIFDKLIGKDFQGELRASGLSLSAQQYNLLNDLTNLKIDGEVPLSSEQKEYILTELMTKEFTRFGVNDVVKLLGVKKERLSGWRLDKKGKPEIHTLKGYRNWRKIFAEAGIDLATLPTETIDCLAKVLTLNTEREGIENTLAFELP…	atgtacagtataggtctggatctggggatctctagcgtgggctggtctgtgattgatgagcgaactgggaacgtcatagatctgggggtgagactcttttcagccaagaatagcgagaagaacctggagcgcagaacgaaccgcggcgggcgccgcctgatcaggcggaaaaccaaccgactcaaggatgctaaaaagatcctggctgccgtgggcttctacgaagacaaatctctgaagaactcctgcccataccaactccgcgtaaagggcctgactgagcctttgagcaggggggagatctataaagtcacattgcacattctcaagaagcggggcatttcctatctggatgaggtcgatactgaggccgccaaggagtctcaggactataaggaa…
103103	Nitratifractor salsuginis (strain DSM 16511 / JCM 12458 / E9I37-1)	GTTTTAAGACCCCTCAAAACCCCACCCTGTTACAA&GTTGTAACAGGGTAGGGTTTTTTGAGGGGTCTTAAAATCAAGAACTGTTACAACAGTTCCATTCTAGGGCCCATCTTCGGACGGGCCTCAGCCTCTATTTACTACTTCTATTTACAGATCAGAATTTT	MKKILGVDLGITSFGYAILQETGKDLYRCLDNSVVMRNNPYDEKSGESSQSIRSTQKSMRRLIEKRKKRIRCVAQTMERYGILDYSETMKINDPKNNPIKNRWQLRAVDAWKRPLSPQELFAIFAHMAKHRGYKSIATEDLIYELELELGLNDPEKESEKKADERRQVYNALRHLEELRKKYGGETIAQTIHRAVEAGDLRSYRNHDDYEKMIRREDIEEEIEKVLLRQAELGALGLPEEQVSELIDELKACITDQEMPTIDESLFGKCTFYKDELAAPAYSYLYDLYRLYKKLADLNIDGYEVTQEDREKVIEWVEKKIAQGKNLKKITHKDLRKILGLAPEQKIFGVEDERIVKGKKEPRTFVPFFFLADIAKFKELFASIQKHPDALQIFRELAEI…	atgaagaaaatcctgggtgtcgacctgggcatcactagctttggatacgcgattcttcaagagactggaaaggacctttataggtgtctggacaattctgtagtgatgaggaataatccctatgacgaaaaatcaggtgagtcaagccagtctatccgcagcacacaaaagagcatgagaaggctgatcgaaaagcgcaaaaaaaggatccgctgtgtggctcagactatggaacgatacggtattcttgactacagcgaaaccatgaaaatcaatgatccaaagaataatcctataaagaaccggtggcaactgcgcgccgtggacgcctggaaaaggcccctcagccctcaggaactgttcgcaatcttcgcccacatggcaaaacacagagggtac…
103105	Solobacterium moorei F0204	GTTTGAGAACTATGTAAATTATGCTGGTAGCAAAA&ATTGTCTTATACCAGTAAGATAATTTACATAGTAAGTTCAAACAAGCTTTTAGCGAAATTACCGCTTTGCGGATTCACATTGTGTGAAGTTAACTCTCGAAAGAGAGTTTT	MEGQMKNNGNNLQQGNYYLGLDVGTSSVGWAVTDTDYNVLKFRGKSMWGARLFDEASTAEERRTHRGNRRRLARRKYRLLLLEQLFEKEIRKIDDNFFVRLHESNLWADDKSKPSKFLLFNDTNFTDKDYLKKYPTIYHLRSDLIHNSTEHDIRLVFLALHHLIKYRGHFIYDNSANGDVKTLDEAVSDFEEYLNENDIEFNIENKKEFINVLSDKHLTKKEKKISLKKLYGDITDSENINISVLIEMLSGSSISLSNLFKDIEFDGKQNLSLDSDIEETLNDVVDILGDNIDLLIHAKEVYDIAVLTSSLGKHKYLCDAKVELFEKNKKDLMILKKYIKKNHPEDYKKIFSSPTEKKNYAAYSQTNSKNVCSQEEFCLFIKPYIRDMVKSENEDEVRI…	atggaaggacaaatgaaaaacaacggcaacaacttgcaacagggcaattattatcttggcctggacgtgggcacttcatccgtaggctgggccgtgacggacaccgactacaatgttctgaaattccgaggcaaaagtatgtggggtgcccgactgttcgatgaggctagcactgcggaggaacgccggacacataggggcaacagacgcagactggctagacggaagtaccgcctgctgttgctggagcagctgtttgagaaggagatccggaagattgacgacaacttttttgtgcggctgcacgagtctaatctgtgggctgatgacaagagtaagccatccaagttcctcctcttcaacgatacaaactttactgataaggattatcttaagaag…
103107	Parasutterella excrementihominis YIT 11859	GCTTCAATCGTACATTCTTTCAATAACAACTGAAA&ATTTCTCGACTTCTGTTGAAAGAATACGCAATTAAAGAGGAAACTATTTTCCTGACTTTGACTATCTGCTAAAAATTAGGCTGAGTTTGGTCAGGGGCGGAATTTT	MGKTHIIGVGLDLGGTYTGTFITSHPSDEAEHRDHSSAFTVVNSEKLSFSSKSRTAVRHRVRSYKGFDLRRRLLLLVAEYQLLQKKQTLAPEERENLRIALSGYLKRRGYARTEAETDTSVLESLDPSVFSSAPSFTNFFNDSEPLNIQWEAIANSPETTKALNKELSGQKEADFKKYIKTSFPEYSAKEILANYVEGRRAILDASKYIANLQSLGHKHRSKYLSDILQDMKRDSRITRLSEAFGSTDNLWRIIGNISNLQERAVRWYFNDAKFEQGQEQLDAVKLKNVLVRALKYLRSDDKEWSASQKQIIQSLEQSGDVLDVLAGLDPDRTIPPYEDQNNRRPPEDQTLYLNPKALSSEYGEKWKSWANKFAGAYPLLTEDLTEILKNTDRKSRIKI…	atgggtaagacacacatcatcggcgtcggtcttgacctgggcggaacctataccggtacctttataacctcccatcccagtgacgaagccgagcaccgcgatcatagctctgcatttaccgtggtgaactccgagaagctctcttttagctctaagtcacggacagccgttcgccatcgggtacggagctacaaggggtttgacctgagacggagattgctcctgctcgtggctgagtaccaacttctgcagaaaaagcaaaccctggcgccagaagaacgcgaaaacctccgcatagcccttagtgggtacctcaagagacgggggtacgcaaggacggaggccgaaaccgacacttccgtcctcgaatctttggatccttccgtattctcatctgcc…
		GTTTCAGTTGTTATTGAAAGAATGTACGATTGAAG&ATAGTTGTGGCAATATCTAGTTACATTCTTTCAACAACGAAATCGCCTTAGGGCGAGCTGAAATCAATTTGATTAAATATTAGATCCGGCTACTGAGGCCTCTTGGCCTTATCCGGATTAACAAGGAGCCTCTATTCGAGGCTTTT
		GTTTCAGTAGTTGTTAGAAGAATGTAGTATTGAAG&GCAATATCTAGTTACATTCTTTCAACAACGAAATCGCCTTAGGGCGAGCTGAAATCAATTTGATTAAATATTAGATCCGGCTACTGAGGCCTCTTGGCCTTATCCGGATTAACAAGGAGCCTCTATTCGAGGCTTTT
		GTTTCAGTTGTTATTGAAAGAATGTACGATTGAAG&ATTTAATTACATTCTTTTAACAACGAAGTCGCCTTCGGGCGAGCTGAAATCAATTTGATTAAATATTAGATCCGGCTACTGAGGTCTTTGACCTTATCCGGATTAACGAAGAGCCTCCGAGGAGGCTTTT
		GTTTCAGTAGTTGTTAGAAGAATGTAGTATTGAAG&CACATTCTTCTAACTGTCGCTGAGACCAAATATTCGGCGTCCAAGAGCGAGACAAACTTTCGTTTACACCCTACTCCACTTCGGTACAATCATCCACGTTGTAAACAAATGCCACTCTCGTCAAAAAGATAGTTG
103108	Streptococcus sanguinis SK49	GTTTTAGAGCTGTGTTGTTTCGAATGGTTCCAAAA&GTTGGAACTATTCGAAACAACACAGCCAAAAGATTTTTCTTTTGAGTTAAAATATGGTTATCCATAATCAGTTATGCGCACCGATTCGGTGCTTTT	MTKFNKNYSIGLDIGVSSVGYAVVTEDYRVPAFKFKVLGNTEKEKIKKNLIGSTTFVSAQPAKGTRVFRVNRRRIDRRNHRITYLRDIFQKEIEKVDKNFYRRLDESFRVLGDKSEDLQIKQPFFGDKELETAYHKKYPTIYHLRKHLADADKNSPVADIREVYMAISHILKYRGHFLTLDKINPNNINMQNSWIDFIESCQEVFDLEISDESKNIADIFKSSENRQEKVKKILPYFQQELLKKDKSIFKQLLQLLFGLKTKFKDCFELEEEPDLNFSKENYDENLENFLGSLEEDFSDVFAKLKVLRDTILLSGMLTYTGATHARFSATMVERYEEHRKDLQRFKFFIKQNLSEQDYLDIFGRKTQNGFDVDKETKGYVGYITNKMVLTNPQKQKTIQ…	atgacgaagttcaacaaaaattacagcatcgggctggacattggagtgagttccgtcggatatgccgtagtcactgaggattatcgcgtgcctgcgttcaagtttaaagtgctcggcaatacagagaaggaaaaaattaagaagaacctgattggttccactaccttcgtcagcgcacagccagccaaaggaactcgcgtgttccgcgttaaccgccgcaggatcgaccgccggaatcatcgaatcacctacctgagggatatctttcaaaaagaaattgagaaggtcgacaagaacttctatcgcagactggacgagagcttccgggtgctcggagataaaagcgaagacctgcagatcaaacaaccgttctttggtgacaaggagctcgaaaccgcc…
103111	Bacillus smithii 7_3_47FAA	GTCATAGTTCCCCTAAGATTATTGCTGTGATATGA&ATCATATCACAGCAATGATCTTAGGGTTACTATGATAAGGGCTTTCTACTTTAGGGGTAGAGATGTCCCGCGGCGTTGGGGATCGCCTATTGCCCTTAAAGGGCACTCCCCATTTT	MNYKMGLDIGIASVGWAVINLDLKRIEDLGVRIFDKAEHPQNGESLALPRRIARSARRRLRRRKHRLERIRRLLVSENVLTKEEMNLLFKQKKQIDVWQLRVDALERKLNNDELARVLLHLAKRRGFKSNRKSERNSKESSEFLKNIEENQSILAQYRSVGEMIVKDSKFAYHKRNKLDSYSNMIARDDLEREIKLIFEKQREFNNPVCTERLEEKYLNIWSSQRPFASKEDIEKKVGFCTFEPKEKRAPKATYTFQSFIVWEHINKLRLVSPDETRALTEIERNLLYKQAFSKNKMTYYDIRKLLNLSDDIHFKGLLYDPKSSLKQIENIRFLELDSYHKIRKCIENVYGKDGIRMFNETDIDTFGYALTIFKDDEDIVAYLQNEYITKNGKRVSNLA…	atgaattacaagatgggccttgacataggtatcgcgtccgtggggtgggccgtcatcaaccttgacctgaaaagaatcgaggatcttggagttagaattttcgacaaggcggagcaccctcagaacggtgaatctttggcccttccccggagaattgcgcgcagtgctaggaggaggctgagacgacggaaacatcgccttgaacggattagacggctgctggtgagcgagaatgtgcttacgaaggaagagatgaacttgctgtttaagcaaaaaaagcagatagacgtgtggcagctgcgcgtggatgccctggaacggaagctgaacaacgacgaactggcacgcgtgcttttgcacctggctaagagaagggggttcaagtctaacagaaagtca…
103112	Oenococcus kitaharae DSM 17330	GCTTCAGATGTGTGTCAGATCAATGAGGTAGAACC&GGGTTCTACCTCATTGATCTGACACACAGCATTGAAGTAAAGCAAGATTAATTTCAAGCTTAATTTTCTTCACATTTTATGTGCAGAAGGGCTTATGCCCACAATACATAAAAAGTCCGCATTCACTTGCGGACTTTT	MARDYSVGLDIGTSSVGWAAIDNKYHLIRAKSKNLIGVRLFDSAVTAEKRRGYRTTRRRLSRRHWRLRLLNDIFAGPLTDFGDENFLARLKYSWVHPQDQSNQAHFAAGLLFDSKEQDKDFYRKYPTIYHLRLALMNDDQKHDLREVYLAIHHLVKYRGHFLIEGDVKADSAFDVHTFADAIQRYAESNNSDENLLGKIDEKKLSAALTDKHGSKSQRAETAETAFDILDLQSKKQIQAILKSVVGNQANLMAIFGLDSSAISKDEQKNYKFSFDDADIDEKIADSEALLSDTEFEFLCDLKAAFDGLTLKMLLGDDKTVSAAMVRRFNEHQKDWEYIKSHIRNAKNAGNGLYEKSKKFDGINAAYLALQSDNEDDRKKAKKIFQDEISSADIPDDVKA…	atggcccgagactacagtgtcggcctcgacataggaacttctagcgtgggttgggcagccatcgacaataaatatcatttgatcagggccaagagcaaaaacctgataggcgtgcgcctgtttgattccgccgtgacggcagagaaaagacgggggtatcgaaccactcgaaggcggctgtcccggcgccattggcggctgaggttgctgaacgacattttcgccggcccactgacggatttcggcgacgagaactttcttgcacgcctgaagtactcctgggtgcaccctcaggatcaaagcaatcaggctcacttcgcagccggactgctgtttgactccaaggagcaagacaaggatttttacagaaagtaccccactatctatcacctgagactg…
103115	Mycoplasma canis PG 14	GTTTTAGTGTTGTACAATATTTGGGTAAACAATAA&ATTATTGTTTACCCAAATATTGTACATCCTAAATCAAGGCGCTTAATTGCTGCCGTAATTGCTGAAAGCGTAGCTTTCAGTTTT	MEKKRKVTLGFDLGIASVGWAIVDSETNQVYKLGSRLFDAPDTNLERRTQRGTRRLLRRRKYRNQKFYNLVKRTEVFGLSSREAIENRFRELSIKYPNIIELKTKALSQEVCPDEIAWILHDYLKNRGYFYDEKETKEDFDQQTVESMPSYKLNEFYKKYGYFKGALSQPTESEMKDNKDLKEAFFFDFSNKEWLKEINYFFNVQKNILSETFIEEFKKIFSFTRDISKGPGSDNMPSPYGIFGEFGDNGQGGRYEHIWDKNIGKCSIFTNEQRAPKYLPSALIFNFLNELANIRLYSTDKKNIQPLWKLSSVDKLNILLNLFNLPISEKKKKLTSTNINDIVKKESIKSIMISVEDIDMIKDEWAGKEPNVYGVGLSGLNIEESAKENKFKFQDLKIL…	atggaaaagaaaagaaaagtgacgttgggattcgacctgggcatagcatctgtgggatgggccattgtggattctgaaaccaaccaggtttacaaactgggttccagactgttcgacgcccccgataccaatctggagaggcggacccagaggggcacccgcaggctgctccgaaggaggaaatacagaaatcagaagttctataatttggtcaaaaggacggaggtcttcggattgtcatcccgggaggccattgagaaccggtttagagagttgtctataaagtatcctaatatcatagagctgaaaacgaaggccctctcccaggaggtgtgtcctgacgaaattgcatggatccttcacgattatctgaaaaatcgcgggtacttctacgacgag…
103117	Rhodovulum sp. PH10	GTTGCGGTTGGGCCGCGCCGCGTTCCCTGCTAGAC&CGTCTAGCAAGGAACGCGGCGTGGCCTCTCCGTTAACAAGGCACATGCCACCAGATCGAGGCGGGCTCCGGTCCGCCTCTTTGCTTTT	MGIRFAFDLGTNSIGWAVWRTGPGVFGEDTAASLDGSGVLIFKDGRNPKDGQSLATMRRVPRQSRKRRDRFVLRRRDLLAALRKAGLFPVDVEEGRRLAATDPYHLRAKALDESLTPHEMGRVIFHLNQRRGFRSNRKADRQDREKGKIAEGSKRLAETLAATNCRTLGEFLWSRHRGTPRTRSPTRIRMEGEGAKALYAFYPTREMVRAEFERLWTAQSRFAPDLLTPERHEEIAGILFRQRDLAPPKIGCCTFEPSERRLPRALPSVEARGIYERLAHLRITTGPVSDRGLTRPERDVLASALLAGKSLTFKAVRKTLKILPHALVNFEEAGEKGLDGALTAKLLSKPDHYGAAWHGLSFAEKDTFVGKLLDEADEERLIRRLVTENRLSEDAARRC…	atgggaatccgcttcgcctttgatctcggcaccaacagcatcggctgggccgtctggaggactggccctggcgtttttggagaggacaccgcggctagcctggacggttcaggggtcttgatctttaaggacggccgcaaccccaaggacggccagtcactggccactatgaggcgcgtcccccggcagagccgcaagcgaagagatcggtttgtgctccggcgccgggacctcctggccgccctgcgcaaggctggtctgttcccagtggacgtcgaggagggaaggcgactcgcagctacggacccgtatcaccttcgcgctaaagcgctggacgagtcattgacaccacacgagatggggagagtgatctttcacctgaaccagagacgcgggttt…
103125	Mycoplasma synoviae (strain 53)	GTTTTGGGGTTGTACAATTATTTTGTTAAGTAAAA&CTTACTTAACAAAATAATTGTACGATTCCAAAATAAGGCGCTTATGTAAGATGCAATAATGCACTTATATAAGCTGCCGTAAACGCCGAGGTAACTCGGTTTT	MLNNVQNLWKYLLLLIFDKKIIFLFKIKVILIRRYMENNNKEKIVIGFDLGVASVGWSIVNAETKEVIDLGVRLFSEPEKADYRRAKRTTRRLLRRKKFKREKFHKLILKNAEIFGLQSRNEILNVYKDQSSKYRNILKLKINALKEEIKPSELVWILRDYLQNRGYFYKNEKLTDEFVSNSFPSKKLHEHYEKYGFFRGSVKLDNKLDNKKDKAKEKDEEEESDAKKESEELIFSNKQWINEIVKVFENQSYLTESFKEEYLKLFNYVRPFNKGPGSKNSRTAYGVFSTDIDPETNKFKDYSNIWDKTIGKCSLFEEEIRAPKNLPSALIFNLQNEICTIKNEFTEFKNWWLNAEQKSEILKFVFTELFNWKDKKYSDKKFNKNLQDKIKKYLLNFAL…	atgctgaacaacgtgcaaaacctgtggaagtatcttctcttgcttatctttgacaagaaaattatttttctgttcaagatcaaggtaatcttgattcgcaggtacatggagaacaacaataaagaaaaaattgtgatagggtttgatctgggtgtggcctcagttggttggagtatcgtgaatgctgaaacaaaagaggtcatcgatctgggcgtgcgactgttcagtgagcctgagaaggcagattacaggcgggctaagcgaaccacacgcagactgctgcgaaggaaaaagtttaaaagagagaaatttcacaaactgatactgaaaaacgcagagattttcggacttcagagtaggaacgaaattctgaacgtctataaggatcagagctctaag…
103127	Legionella pneumophila (strain Paris)	GTTTCAGTGGTTGGATTTTTAGATGAGGGATTATTG&GCAATAATTAAATTAGAAATCATCTAAATTTCGATACCCTGAAATCAACAAAATTAAAGATTGAATCGTTTTTCTATGCTCGTCTTAATAGCGAGCATATAACGATTTCAAAATCTATCGTTACAGTGATTTAGAAACTCACACTGAATGCATTGAAGTCCAT	MESSQILSPIGIDLGGKFTGVCLSHLEAFAELPNHANTKYSVILIDHNNFQLSQAQRRATRHRVRNKKRNQFVKRVALQLFQHILSRDLNAKEETALCHYLNNRGYTYVDTDLDEYIKDETTINLLKELLPSESEHNFIDWFLQKMQSSEFRKILVSKVEEKKDDKELKNAVKNIKNFITGFEKNSVEGHRHRKVYFENIKSDITKDNQLDSIKKKIPSVCLSNLLGHLSNLQWKNLHRYLAKNPKQFDEQTFGNEFLRMLKNFRHLKGSQESLAVRNLIQQLEQSQDYISILEKTPPEITIPPYEARTNTGMEKDQSLLLNPEKLNNLYPNWRNLIPGIIDAHPFLEKDLEHTKLRDRKRIISPSKQDEKRDSYILQRYLDLNKKIDKFKIKKQLSFL…	atggagtctagtcaaattctttctccgattggaattgatctggggggtaaattcacaggcgtctgtctgagccacctcgaggcgttcgctgagctgcccaatcacgcaaatacgaaatattccgtgattctgattgaccataataacttccaactgtctcaggcacagcgccgcgcaacgagacatagggtaagaaataaaaaaaggaatcaatttgtaaagcgagttgcactgcagctgttccaacacattctttccagagatctgaatgcaaaggaggaaaccgccctgtgccactatttgaacaaccgagggtatacttacgtggacaccgacctggacgaatacatcaaggatgaaactacaattaaccttctcaaagagctcctgccttctgag…
103131	Listeria innocua serovar 6a (strain CLIP 11262)	GTTTTAGAGCTATGTTATTTTGAATGCTAACAAAA&ATTGTTAGTATTCAAAATAACATAGCAAGTTAAAATAAGGCTTTGTCCGTTATCAACTTTTAATTAAGTAGCGCTGTTTCGGCGCTTTT	MKKPYTIGLDIGTNSVGWAVLTDQYDLVKRKMKIAGDSEKKQIKKNFWGVRLFDEGQTAADRRMARTARRRIERRRNRISYLQGIFAEEMSKTDANFFCRLSDSFYVDNEKRNSRHPFFATIEEEVEYHKNYPTIYHLREELVNSSEKADLRLVYLALAHIIKYRGNFLIEGALDTQNTSVDGIYKQFIQTYNQVFASGIEDGSLKKLEDNKDVAKILVEKVTRKEKLERILKLYPGEKSAGMFAQFISLIVGSKGNFQKPFDLIEKSDIECAKDSYEEDLESLLALIGDEYAELFVAAKNAYSAVVLSSIITVAETETNAKLSASMIERFDTHEEDLGELKAFIKLHLPKHYEEIFSNTEKHGYAGYIDGKTKQADFYKYMKMTLENIEGADYFIAKI…	atgaagaagccatatacaattggactggatatcggtactaattctgtgggatgggcagtgctcacagaccagtacgatctggttaagagaaagatgaaaatcgcaggcgattctgagaagaagcagatcaaaaaaaatttttggggagtcaggcttttcgatgagggccagactgctgcagatcgaagaatggccaggacagctagacgcaggattgaacggcgacggaacagaatctcttacttgcaagggatctttgccgaggagatgagcaagaccgatgccaatttcttttgtaggcttagtgattctttctacgtagataacgaaaagcgcaatagccggcatcccttctttgcgactatcgaggaggaggtggaataccataaaaattacccc…
SauriCas9	Staphylococcus auricularis	gtttcattcatacttaaaatcacagtgtactaaaac&attgtatttatacttaaaatcacagtatctactaaaacaagactatatgtcgtgtttatcccgtcaatttattggcgggattttt (by prediction)	MQENQQKQNYILGLDIGITSVGYGLIDSKTREVIDAGVRLFPEADSENNSNRRSKRGARRLKRRRIHRLNRVKDLLADYQMIDLNNVPKSTDPYTIRVKGLREPLTKEEFAIALLHIAKRRGLHNISVSMGDEEQDNELSTKQQLQKNAQQLQDKYVCELQLERLTNINKVRGEKNRFKTEDFVKEVKQLCETQRQYHNIDDQFIQQYIDLVSTRREYFEGPGNGSPYGWDGDLLKWYEKLMGRCTYFPEELRSVKYAYSADLFNALNDLNNLVVTRDDNPKLEYYEKYHIIENVFKQKKNPTLKQIAKEIGVQDYDIRGYRITKSGKPQFTSFKLYHDLKNIFEQAKYLEDVEMLDEIAKILTIYQDEISIKKALDQLPELLTESEKSQIAQLTGYTG…	ATGCAGGAGAACCAGCAGAAGCAGAACTACATCCTGGGCCTGGACATCGGAATCACCAGCGTCGGCTACGGACTGATCGATAGCAAGACAAGAGAAGTGATCGACGCCGGCGTTAGACTCTTTCCAGAAGCTGATAGCGAGAACAACTCCAACCGCAGAAGCAAGCGGGGCGCCAGACGGTTAAAACGGAGAAGAATCCACCGGCTGAACCGGGTCAAAGACCTGCTCGCTGATTACCAGATGATCGATCTTAACAATGTTCCTAAGAGCACCGACCCCTACACCATCAGAGTGAAGGGCCTCCGGGAGCCTCTGACAAAAGAAGAATTCGCCATCGCCCTCCTGCATATCGCTAAGAGAAGAGGCCTGCACAACATCAGTGTGTCCATGGGCGACGAA…
		gttttagtactctggaaacagaatctactaaaacaaggcaaaatgccgtgtttatctcgtcaacttgttggcgagattttt
eSa-SauriCas9		gttttagtactctggaaacagaatctactaaaacaaggcaaaatgccgtgtttatctcgtcaacttgttggcgagattttt (gRNA scaffold)	MKRNYILGLDIGITSVGYGIIDYETRDVIDAGVRLFKEANVENNEGRRSKRGARRLKRRRRHRIQRVKKLLFDYNLLTDHSELSGINPYEARVKGLSQKLSEEEFSAALLHLAKRRGVHNVNEVEEDTGNELSTKEQISRNSKALEEKYVAELQLERLKKDGEVRGSINRFKTSDYVKEAKQLLKVQKAYHQLDQSFIDTYIDLLETRRTYYEGPGEGSPFGWKDIKEWYEMLMGHCTYFPEELRSVKYAYNADLYNALNDLNNLVITRDENEKLEYYEKFQIIENVFKQKKKPTLKQIAKEILVNEEDIKGYRVTSTGKPEFTNLKVYHDIKDITARKEIIENAELLDQIAKILTIYQSSEDIQEELTNLNSELTQEEIEQISNLKGYTGTHNLSLKA…
SauriCas9-KKH	Staphylococcus auricularis	gttttagtactctggaaacagaatctactaaaacaaggcaaaatgccgtgtttatctcgtcaacttgttggcgagattttt (gRNA scaffold)	MQENQQKQNYILGLDIGITSVGYGLIDSKTREVIDAGVRLFPEADSENNSNRRSKRGARRLKRRRIHRLNRVKDLLADYQMIDLNNVPKSTDPYTIRVKGLREPLTKEEFAIALLHIAKRRGLHNISVSMGDEEQDNELSTKQQLQKNAQQLQDKYVCELQLERLTNINKVRGEKNRFKTEDFVKEVKQLCETQRQYHNIDDQFIQQYIDLVSTRREYFEGPGNGSPYGWDGDLLKWYEKLMGRCTYFPEELRSVKYAYSADLFNALNDLNNLVVTRDDNPKLEYYEKYHIIENVFKQKKNPTLKQIAKEIGVQDYDIRGYRITKSGKPQFTSFKLYHDLKNIFEQAKYLEDVEMLDEIAKILTIYQDEISIKKALDQLPELLTESEKSQIAQLTGYTG…
